# Supplementary material for: Accumulation of Carbonyl Proteins in the Brain of Mouse Model for Methylglyoxal Detoxification Deficits
Source: PubMed Central journal article supplement (PMC8068291; doi:10.3390/antiox10040574), 2021-04-08

# Supplemental Figure 2C

## anti:PEN

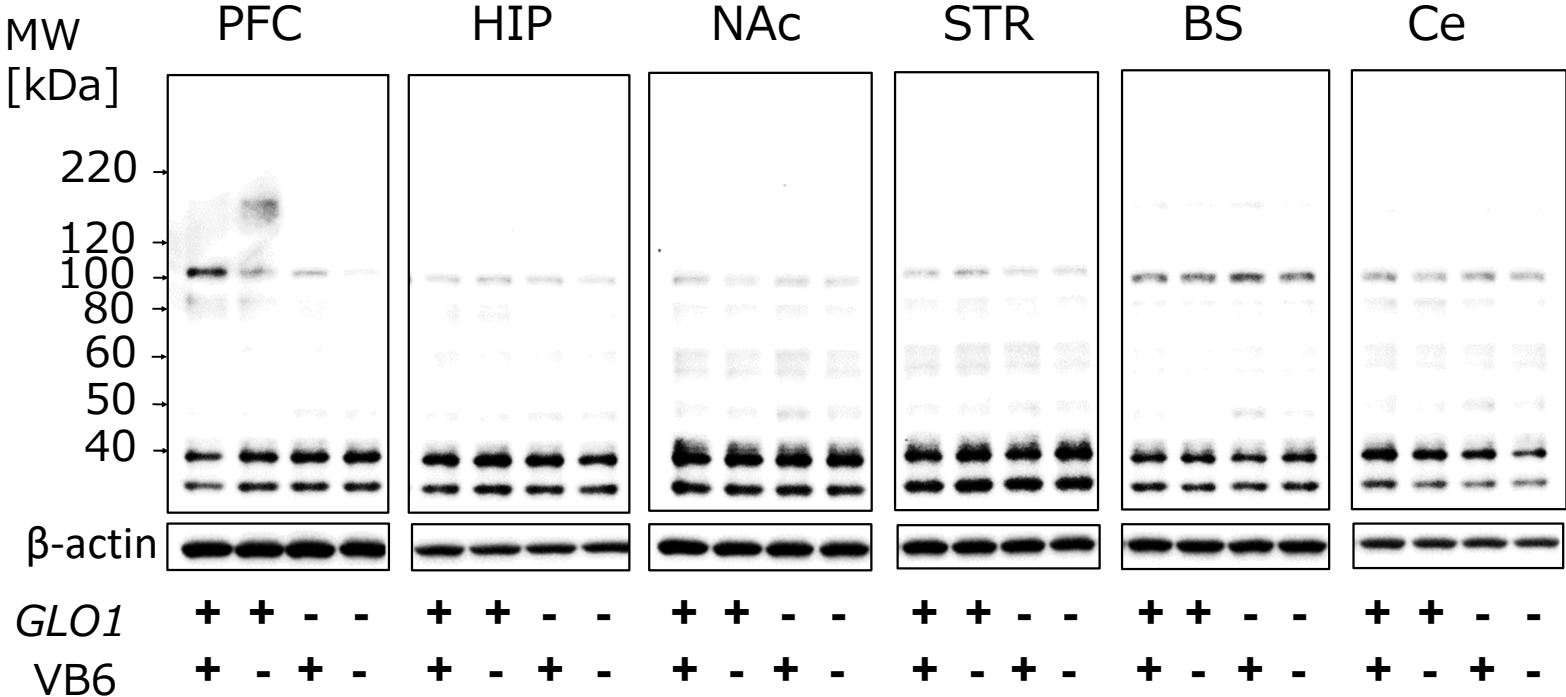

Supplement: antioxidants-10-00574-s001.pdf [file antioxidants-10-00574-s001.pdf]
